# Supplementary material
Source: publisher site journal article supplement (https://www.dovepress.com/article/371812)
Supplement: Supplementary file 1 [file get_supplementary_file.php]

**Supplementary materials**


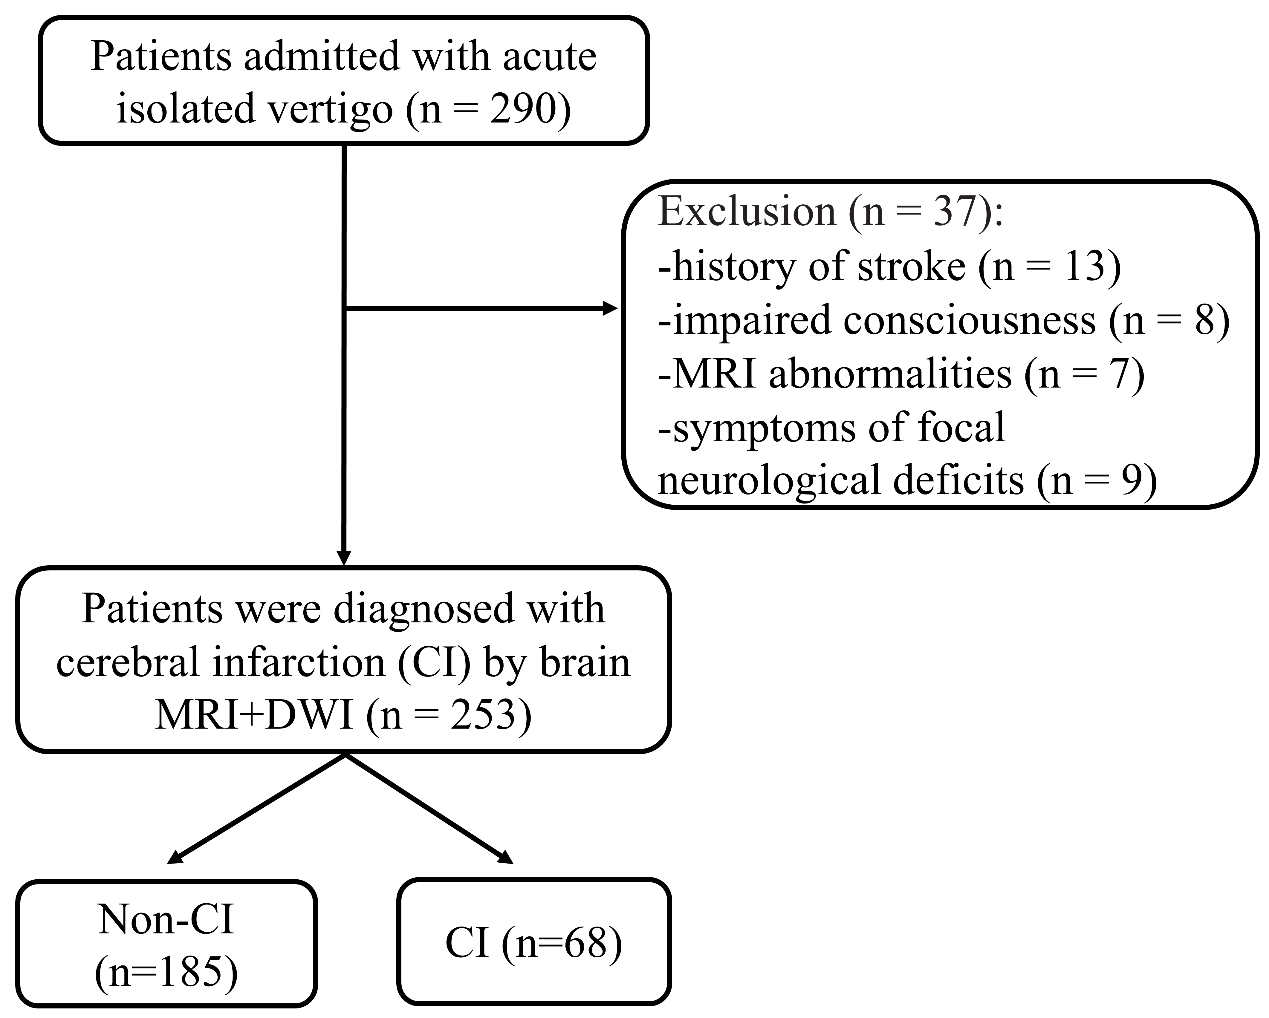


Figure S1. Flow chart.


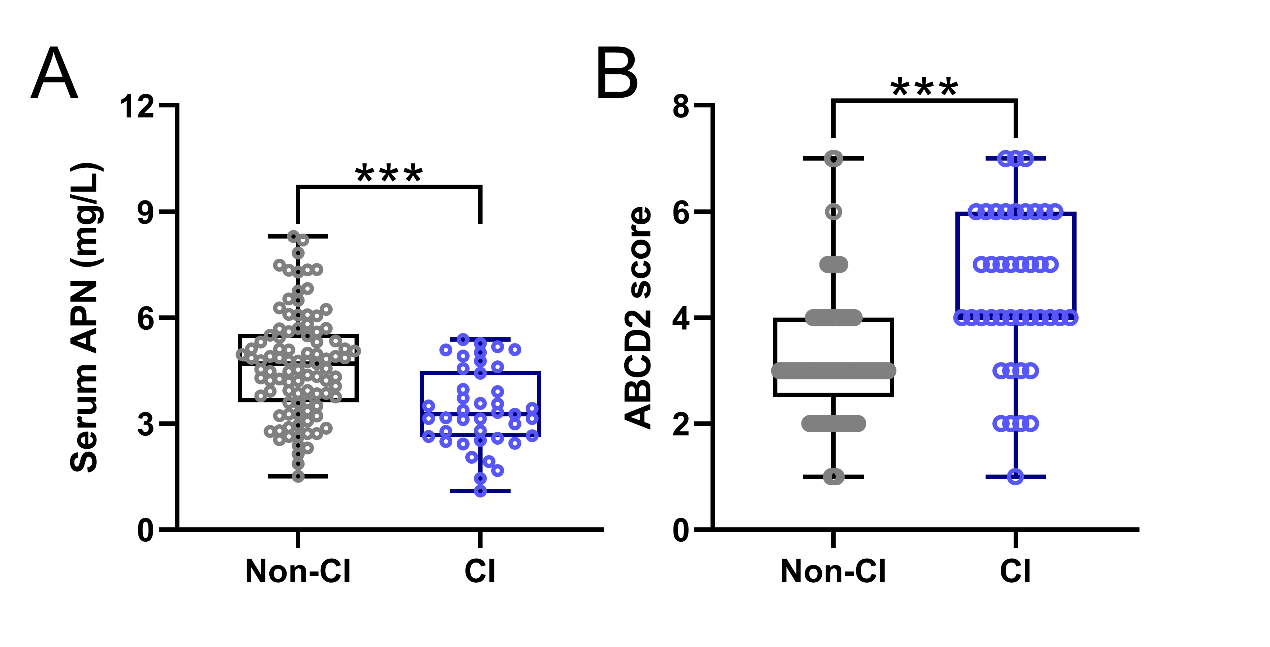


Figure S2. A, Comparisons of serum adiponectin between acute, isolated vertigo complicated with and without cerebral infarction among patients with age more than 60 years. B, Clinical ABCD2 score between acute, isolated vertigo complicated with and without cerebral infarction among patients with age more than 60 years. N = 97 for Non-CI and N = 41 for CI. ***p < 0.001.


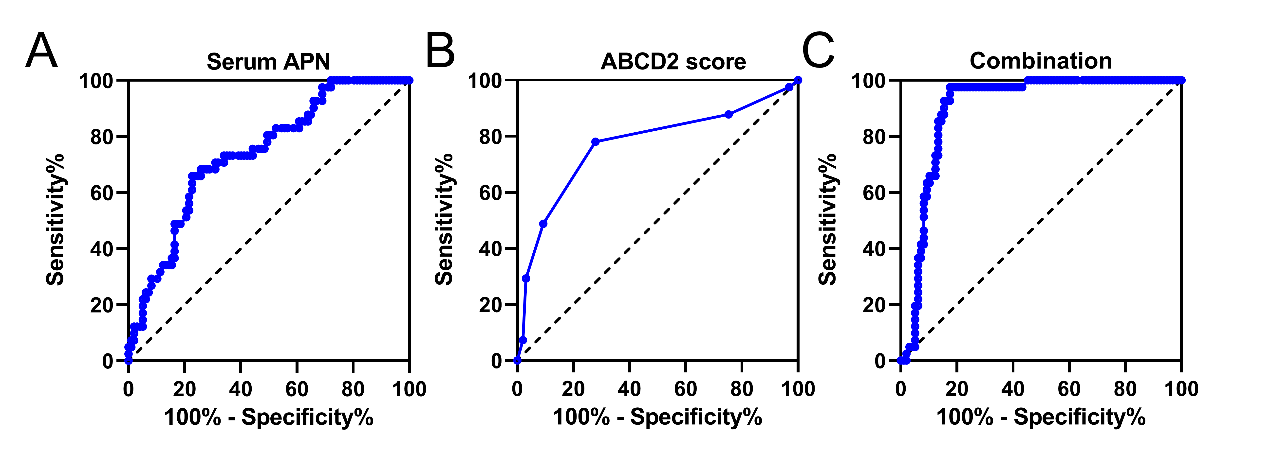


**Figure S3**. ROC analysis of serum adiponectin (A), clinical ABCD2 score (B) and combination of serum adiponectin with clinical ABCD2 score (C) in detecting cerebral infarction among acute, isolated vertigo patients among patients with age more than 60 years.

Table S1. Classification of cerebral infarction in acute, isolated vertigo complicated with cerebral infarction (CI).

|  | CI (n=68) |
| --- | --- |
| Ischemic stroke subtypes | |
| Cerebral thrombosis | 39 (57.3%) |
| Cerebral embolism | 18 (26.5%) |
| Lacunar cerebral infarction | 11 (16.2%) |
| Ischemic stroke locations | |
| Brainstem | 10 (14.7%) |
| Lobe | 15 (22.1%) |
| Cerebellum | 12 (17.6%) |
| Basal ganglia region | 31 (45.6%) |

The data presented are n (percentage).

Table S2. Diagnostic values in ROC analysis of patients with age more than 60 years.

|  | Cut-off value | AUC (95% CI) | p | Sensitivity (%) | Specificity% (%) | Youden index |
| --- | --- | --- | --- | --- | --- | --- |
| Serum APN | 3.59 mg/L | 0.7386 (0.6514 to 0.8259) | < 0.001 | 65.85 | 76.29 | 0.432 |
| ABCD2 | 4 | 0.7689 (0.6726 to 0.8652) | < 0.001 | 78.05 | 72.16 | 0.502 |
| Combination | - | 0.8703 (0.8171 to 0.9135) | < 0.001 | 86.24 | 80.15 | 0.664 |

CI: confidence interval.

Table S3. Diagnostic values of positive predictive value and negative predictive value in ROC analysis of serum adiponectin, clinical ABCD2 score and combination of serum adiponectin with clinical ABCD2 score in the diagnosis of cerebral infarction among acute, isolated vertigo patients (Figure 2).

|  | positive predictive value | negative predictive value |
| --- | --- | --- |
| Serum APN | 46.84% | 82.18% |
| ABCD2 | 44.44% | 82.82% |
| Combination | 56.67% | 89.57% |
